# Supplementary material
Source: PubMed Central journal article supplement (PMC3829948)
Supplement: bact-3-e26649-s01.pdf [file bact-3-e26649-s01.pdf]

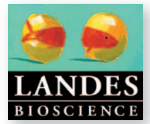

## **Supplemental Material to:**

**Karlene H Lynch, Yongjie Liang, Leo Eberl, David S Wishart,  
Jonathan J Dennis**

**Identification and characterization of  $\phi$ H111-1:  
A novel myovirus with broad activity against clinical  
isolates of *Burkholderia cenocepacia***

**Bacteriophage 2013; 3(4)**

**<http://dx.doi.org/10.4161/bact.26649>**

**<http://www.landesbioscience.com/journals/bacteriophage/article/26649>**

1 Table S1:  $\phi$ H111-1 host range

| Category                        | <i>Burkholderia</i> species | Strain or isolate  | Lysis     |
|---------------------------------|-----------------------------|--------------------|-----------|
| Strain panel <sup>22,23</sup>   | <i>B. cepacia</i>           | LMG 18821          | -         |
|                                 |                             | ATCC 17759         | -         |
|                                 | <i>B. multivorans</i>       | ATCC 17616         | +         |
|                                 |                             | C5274              | +         |
|                                 |                             | C5393              | -         |
|                                 |                             | C3430              | -         |
|                                 | <i>B. cenocepacia</i>       | C6433              | +         |
|                                 |                             | 715J               | +         |
|                                 |                             | J2315              | +         |
|                                 |                             | K56-2              | +         |
|                                 |                             | C1257              | +         |
|                                 |                             | C5424              | +         |
|                                 |                             | PC184              | +         |
|                                 |                             | C4455              | -         |
|                                 |                             | CEP511             | -         |
|                                 |                             | <i>B. stabilis</i> | LMG 14294 |
|                                 | LMG 18870                   |                    | -         |
|                                 | <i>B. vietnamiensis</i>     | LMG 10929          | -         |
|                                 |                             | LMG 18835          | -         |
|                                 |                             | DBO1               | -         |
|                                 | <i>B. dolosa</i>            | LMG 18943          | -         |
|                                 |                             | LMG 21443          | -         |
|                                 | <i>B. ambifaria</i>         | LMG 17828          | -         |
| LMG 19182                       |                             | -                  |           |
| LMG 19467                       |                             | -                  |           |
| <i>B. anthina</i>               | LMG 16670                   | -                  |           |
| <i>B. pyrrocinia</i>            | LMG 14191                   | -                  |           |
| Clinical isolates <sup>13</sup> | <i>B. multivorans</i>       | M1512              | -         |
|                                 |                             | M1865              | -         |

|                              |                                   |          |   |
|------------------------------|-----------------------------------|----------|---|
|                              |                                   | R810     | - |
|                              |                                   | R1159    | - |
|                              | <i>B. cenocepacia</i>             | R161     | + |
|                              |                                   | R452     | + |
|                              |                                   | R750     | + |
|                              |                                   | R1284    | + |
|                              |                                   | R1285    | + |
|                              |                                   | R1314    | + |
|                              |                                   | R1434    | + |
|                              |                                   | R1619    | + |
|                              |                                   | R1882    | + |
|                              |                                   | R1883    | + |
|                              |                                   | R1884    | + |
|                              |                                   | R2314    | + |
|                              |                                   | S11528   | + |
| LPS mutants <sup>11,12</sup> | <i>B. cenocepacia</i> (all K56-2) | wildtype | + |
|                              |                                   | RSF19    | + |
|                              |                                   | XOA7     | + |
|                              |                                   | XOA15    | + |
|                              |                                   | XOA17    | + |
|                              |                                   | XOA8     | - |
|                              |                                   | CCB1     | - |

3 Table S2:  $\phi$ H111-1 HHpred analysis

| Protein | Motif of closest relative | Motif definition                                        | Percent probability | E-value              |
|---------|---------------------------|---------------------------------------------------------|---------------------|----------------------|
| gp2     | 1zn6_A                    | Phage-related conserved hypothetical protein            | 100                 | 7.10e <sup>-58</sup> |
| gp10    | 2g1p_A                    | DNA adenine methylase                                   | 100                 | 8.00e <sup>-60</sup> |
| gp12    | 2ikb_A                    | Hypothetical protein NMB1012                            | 100                 | 1.10e <sup>-59</sup> |
| gp14    | 3d37_A                    | Tail protein, 43 kDa                                    | 100                 | 5.40e <sup>-40</sup> |
| gp15    | 2djp_A                    | Hypothetical protein SB145                              | 99.48               | 1.70e <sup>-14</sup> |
| gp20    | 3j2m_U                    | Tail sheath protein GP18                                | 100                 | 1.10e <sup>-55</sup> |
| gp21    | 2kz6_A                    | Uncharacterized protein                                 | 98.09               | 8.50e <sup>-6</sup>  |
| gp22    | 2xgf_A                    | Long tail fiber protein P37                             | 100                 | 2.70e <sup>-37</sup> |
| gp24    | 3h2t_A                    | Baseplate structural protein GP6                        | 99.02               | 4.30e <sup>-9</sup>  |
| gp25    | 2ia7_A                    | Tail lysozyme, putative                                 | 99.93               | 2.80e <sup>-25</sup> |
| gp27    | 3qr8_A                    | GPV, baseplate assembly protein V                       | 100                 | 9.50e <sup>-43</sup> |
| gp28    | 2gfv_A                    | Putative cytoplasmic protein                            | 95.21               | 0.39                 |
| gp30    | 1k0h_A                    | Gpfii                                                   | 99.97               | 7.10e <sup>-34</sup> |
| gp31    | 3bqw_A                    | Putative capsid protein of prophage                     | 100                 | 8.40e <sup>-52</sup> |
| gp32    | 1td4_A                    | Head decoration protein                                 | 97.78               | 0.00013              |
| gp33    | 1tg6_A                    | Putative ATP-dependent CLP protease proteolytic S       | 99.96               | 3.80e <sup>-29</sup> |
| gp34    | 2jes_A                    | Portal protein                                          | 98.31               | 3.90e <sup>-5</sup>  |
| gp35    | 1hyw_A                    | GPW, head-TO-tail joining protein W                     | 99.77               | 7.80e <sup>-19</sup> |
| gp36    | 2o0j_A                    | Terminase, DNA packaging protein GP17                   | 98.9                | 8.70e <sup>-9</sup>  |
| gp37    | 1j9i_A                    | GPNU1 DBD                                               | 97.73               | 2.60e <sup>-5</sup>  |
| gp39    | 1nlt_A                    | Protein YDJ1, mitochondrial protein import protein MAS5 | 99.93               | 3.60e <sup>-26</sup> |
| gp40    | 1nui_A                    | DNA primase/helicase                                    | 99.38               | 8.90e <sup>-13</sup> |
| gp42    | 3e7l_A                    | Transcriptional regulator (NTRC family)                 | 91.04               | 0.37                 |
| gp43    | 3bd1_A                    | CRO protein                                             | 99.8                | 4.60e <sup>-20</sup> |
| gp44    | 3bs3_A                    | Putative DNA-binding protein                            | 99.79               | 5.90e <sup>-20</sup> |
| gp47    | 1vz0_A                    | PARB, chromosome partitioning protein PARB              | 99.96               | 2.60e <sup>-28</sup> |
| gp50    | 1z4h_A                    | TORI, TOR inhibition protein                            | 99.66               | 1.60e <sup>-16</sup> |
| gp51    | 3ubt_Y                    | Modification methylase HAEIII                           | 100                 | 8.40e <sup>-73</sup> |
| gp52    | 4f0q_A                    | Restriction endonuclease                                | 91.41               | 0.81                 |
| gp53    | 1vz0_A                    | PARB, chromosome partitioning protein PARB              | 99.97               | 3.70e <sup>-31</sup> |
| gp54    | 1z1b_A                    | Integrase                                               | 100                 | 2.70e <sup>-39</sup> |

4 HHpred hits with  $\geq 90\%$  probability have been listed.

5 Table S3: BLASTN and PHAST analysis of nucleotide sequences closely related to  $\phi$ H111-1

| <i>Burkholderia</i> strain (all chromosome 1) | BLASTN query coverage (%) | BLASTN E-value | BLASTN alignment region | PHAST prediction                     |
|-----------------------------------------------|---------------------------|----------------|-------------------------|--------------------------------------|
| <i>B. gladioli</i> BSR3                       | 78                        | 0              | 3,123,511-3,138,769     | intact prophage; 3,108,388-3,134,134 |
| <i>B. glumae</i> BGR1                         | 70                        | 0              | 3,096,940-3,109,799     | intact prophage; 3,075,378-3,102,996 |
| <i>B. ambifaria</i> AMMD                      | 69                        | 0              | 2,058,351-2,065,877     | intact prophage; 2,023,987-2,070,156 |
| <i>B. pseudomallei</i> BPC006                 | 65                        | 0              | 1,113,292-1,124,344     | intact prophage; 1,099,056-1,147,321 |
| <i>B. pseudomallei</i> 1026b                  | 64                        | 0              | 1,175,535-1,186,832     | intact prophage; 1,176,397-1,201,823 |
| <i>B. pseudomallei</i> MSHR346                | 62                        | 0              | 2,640,168-2,651,467     | intact prophage; 2,625,992-2,650,729 |

6
